# Supplementary material for: Light driven water oxidation on silica supported NiO–TiO2 heteronanocrystals yields hydrogen peroxide
Source: Royal Society of Chemistry journal article supplement (doi:10.1039/d4na00906a), 2025-01-01
Supplement: d4na00906a1.pdf [file d4na00906a1.pdf]

# Light driven water oxidation on silica supported NiO-TiO<sub>2</sub> heteronanocrystals yields hydrogen peroxide

Nurul Muttakin,<sup>1</sup> Shelton J.P. Varapragasam,<sup>1</sup> Rashed Mia,<sup>1</sup> Mahfuz A. Swaden,<sup>1</sup> Michael Odlyzko,<sup>2</sup> James D. Hoefelmeyer\*<sup>1</sup>

<sup>1</sup> Department of Chemistry, University of South Dakota, Vermillion, SD 57069

<sup>2</sup> Characterization Facility, University of Minnesota, Minneapolis, MN 55455

\* Corresponding author email: james.hoefelmeyer@usd.edu

## Supporting information

### Contents

|                                                                                                                                                                                                                                                                                       |        |
|---------------------------------------------------------------------------------------------------------------------------------------------------------------------------------------------------------------------------------------------------------------------------------------|--------|
| <b>Figure S1.</b> HRTEM image of NiO-TiO <sub>2</sub> heteronanocrystal.                                                                                                                                                                                                              | Page 2 |
| <b>Figure S2.</b> A) UV-Visible absorption spectra of dilute dispersions of TiO <sub>2</sub> , TiO <sub>2</sub> -NiO, and B) Photoluminescence emission spectra ( $\lambda_{\text{ex}} = 300 \text{ nm}$ ) of anatase TiO <sub>2</sub> and TiO <sub>2</sub> -NiO HNCs.                | Page 3 |
| <b>Figure S3.</b> Photograph of aqueous suspension of SiO <sub>2</sub> /NiO-TiO <sub>2</sub> (NiO-TiO <sub>2</sub> heteronanocrystals supported on fumed silica) after 24 hours illumination with unfiltered light from 150W Xe arc lamp.                                             | Page 4 |
| <b>Figure S4.</b> a) Formation of Ag nanoparticles on the aqueous solution after irradiation of light in presence of photocatalyst and b) TEM image of Ag nanoparticles.                                                                                                              | Page 5 |
| <b>Figure S5.</b> a) Formation of an iron (III) thiocyanate complex ion Fe(SCN) <sup>2+</sup> from Fe <sup>3+</sup> and SCN <sup>-</sup> in the reaction vessel b) absorbance maxima $\lambda_{\text{max}} = 450 \text{ nm}$ of Fe(SCN) <sup>2+</sup> taken at desired time interval. | Page 6 |
| Analysis of EDS data for NiO-TiO <sub>2</sub> heteronanocrystal sample.                                                                                                                                                                                                               | Page 7 |

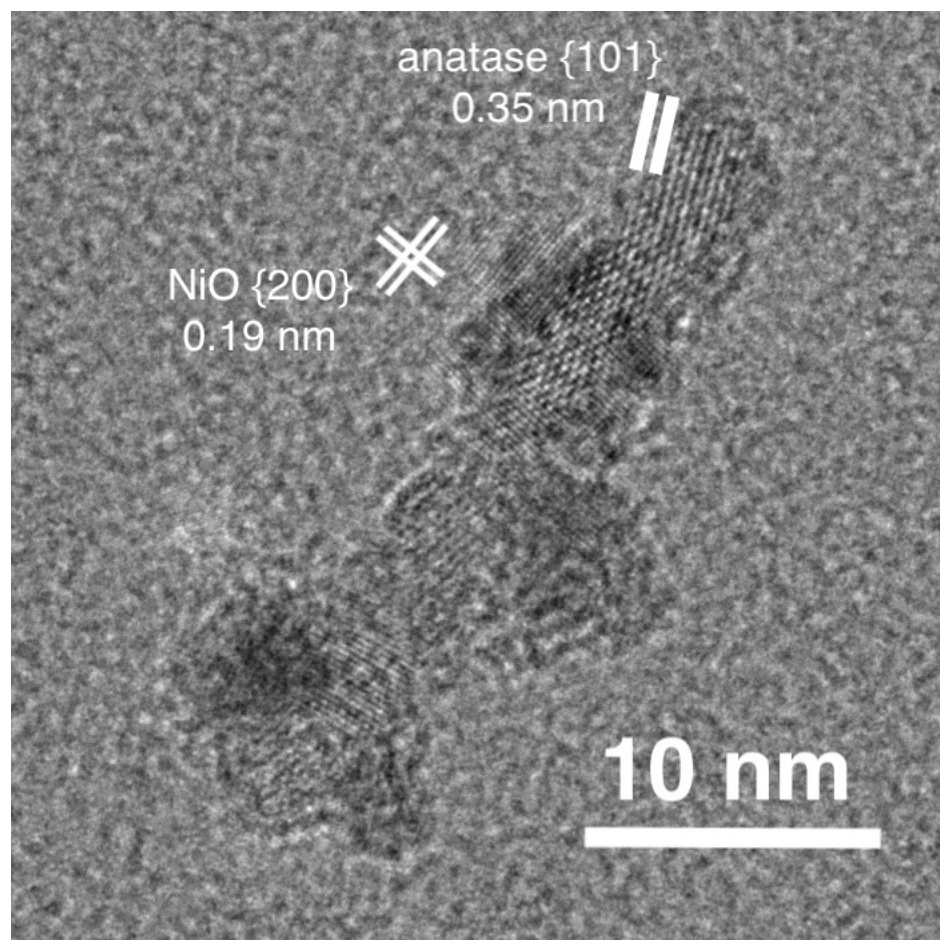

**Figure S1.** HRTEM image of NiO-TiO<sub>2</sub> heteronanocrystal.

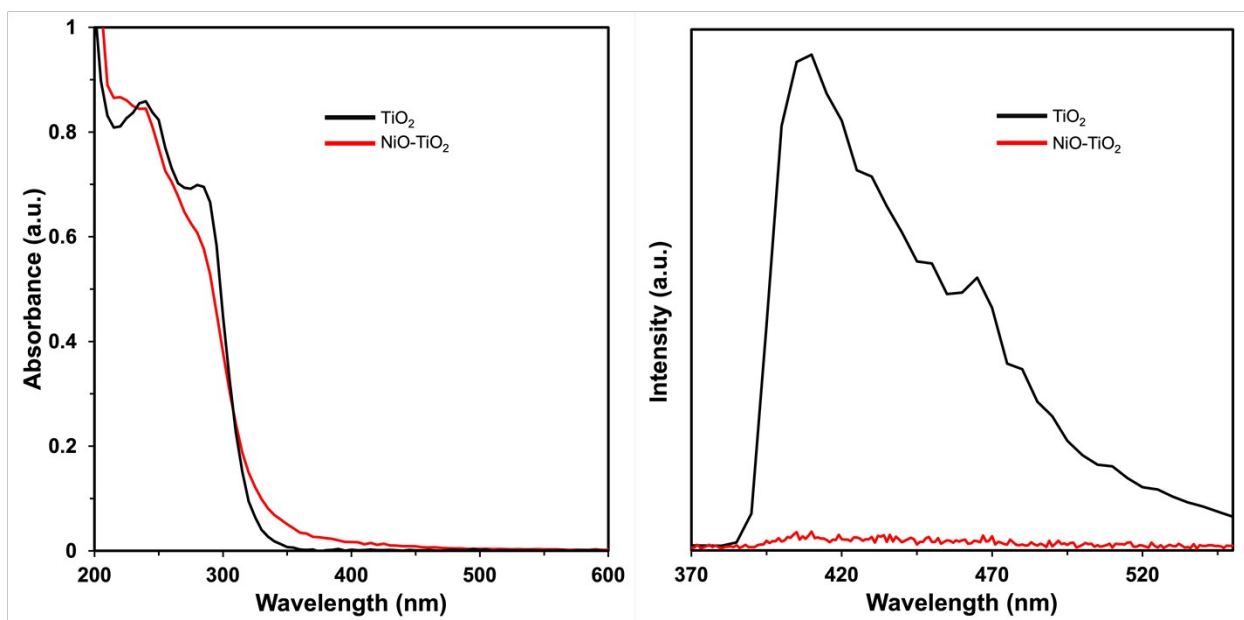

**Figure S2.** A) UV-Visible absorption spectra of dilute dispersions of TiO<sub>2</sub>, TiO<sub>2</sub>-NiO, and B) Photoluminescence emission spectra ( $\lambda_{\text{ex}} = 300$  nm) of *anatase* TiO<sub>2</sub> and TiO<sub>2</sub>-NiO HNCs.

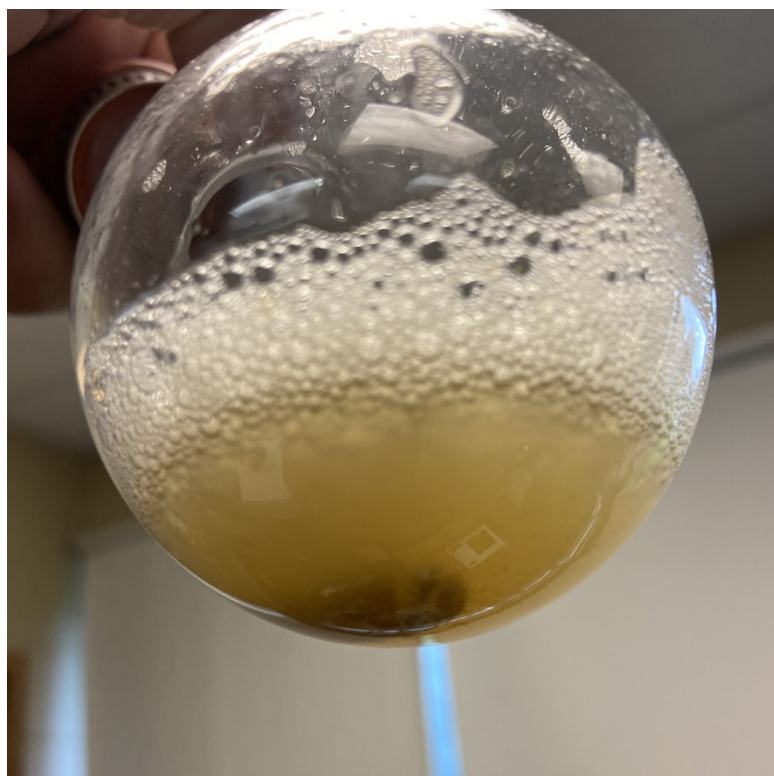

**Figure S3.** Photograph of aqueous suspension of  $\text{SiO}_2/\text{NiO-TiO}_2$  ( $\text{NiO-TiO}_2$  heteronanocrystals supported on fumed silica) after 24 hours illumination with unfiltered light from 150W Xe arc lamp.

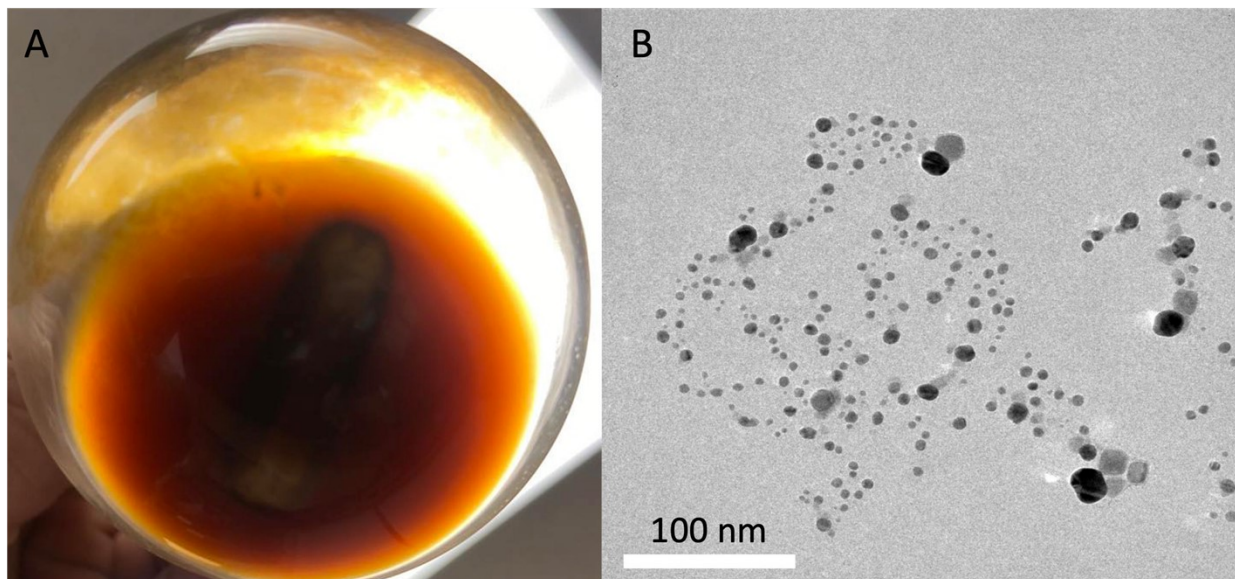

**Figure S4.** Irradiation of  $\text{SiO}_2/\text{NiO-TiO}_2$  in dilute aqueous silver nitrate leads to formation of Ag nanoparticles. A) Photograph of the catalyst suspension after irradiation. B) TEM image of Ag nanoparticles.

Alternatively, we demonstrate a fast colorimetric test for hole scavenging upon irradiation of aqueous, anaerobic  $\text{Fe}^{2+}$  and thiocyanide ion that gives dark red colored solutions upon oxidation to  $\text{Fe}^{3+}$  (Figure S2). In these conditions, the absorbance at 450 nm abruptly rises, then decreases to a constant value that we presume is due to the back-reaction in which  $\text{Fe}^{3+}$  is reduced back to  $\text{Fe}^{2+}$  by photogenerated electrons on  $\text{TiO}_2$ .

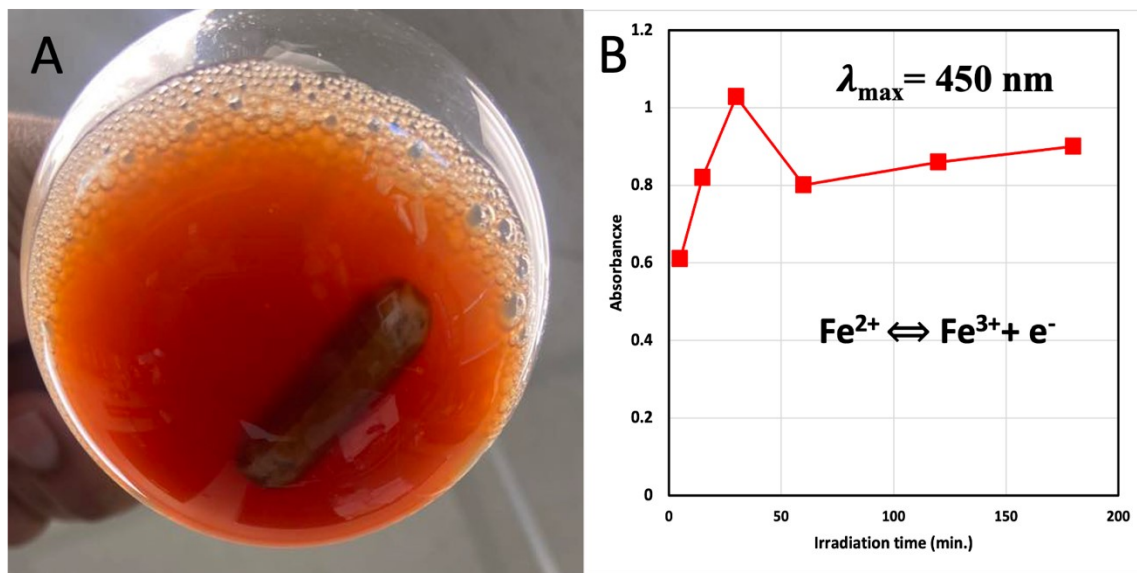

**Figure S5.** a) Formation of an iron (III) thiocyanate complex ion  $\text{Fe}(\text{SCN})^{2+}$  from  $\text{Fe}^{3+}$  and  $\text{SCN}^-$  in the reaction vessel b) absorbance maxima  $\lambda_{\text{max}} = 450 \text{ nm}$  of  $\text{Fe}(\text{SCN})^{2+}$  taken at desired time interval.

**Analysis of EDS data for NiO-TiO<sub>2</sub> heteronanocrystal sample.**

2023-07-07 11:49:39 Analysis of spectrum: Spectra from Area #1 (Brown-Powell general)

| Z  | Element        | Family | Atomic Fraction (%) | Atomic Error (%) | Mass Fraction (%) |
|----|----------------|--------|---------------------|------------------|-------------------|
|    | Mass Error (%) |        | Fit error (%)       |                  |                   |
| 6  | C              | K      | 72.91 5.19          | 57.99 2.48       | 0.09              |
| 7  | N              | K      | 0.00 0.04           | 0.00 0.04        | 0.00              |
| 8  | O              | K      | 18.47 3.92          | 19.57 4.00       | 0.15              |
| 11 | Na             | K      | 1.59 0.33           | 2.42 0.49        | 0.24              |
| 13 | Al             | K      | 2.02 0.42           | 3.60 0.73        | 0.23              |
| 14 | Si             | K      | 0.84 0.17           | 1.56 0.31        | 0.46              |
| 15 | P              | K      | 0.21 0.04           | 0.43 0.08        | 2.18              |
| 19 | K              | K      | 0.34 0.06           | 0.87 0.16        | 0.88              |
| 22 | Ti             | K      | 0.75 0.11           | 2.38 0.33        | 0.38              |
| 26 | Fe             | K      | 0.16 0.02           | 0.59 0.08        | 1.26              |
| 28 | Ni             | K      | 2.73 0.41           | 10.60 1.48       | 0.12              |

2023-07-07 11:52:58 Analysis of spectrum: Spectra from Area #1 (Schreiber-Wims oxide-optimized)

| Z  | Element        | Family | Atomic Fraction (%) | Atomic Error (%) | Mass Fraction (%) |
|----|----------------|--------|---------------------|------------------|-------------------|
|    | Mass Error (%) |        | Fit error (%)       |                  |                   |
| 6  | C              | K      | 69.25 5.28          | 52.23 2.38       | 0.09              |
| 7  | N              | K      | 0.00 0.04           | 0.00 0.04        | 0.00              |
| 8  | O              | K      | 19.87 4.25          | 19.97 4.10       | 0.15              |
| 11 | Na             | K      | 1.83 0.39           | 2.64 0.54        | 0.24              |
| 13 | Al             | K      | 2.35 0.50           | 3.99 0.81        | 0.23              |
| 14 | Si             | K      | 0.99 0.20           | 1.74 0.34        | 0.46              |

|    |    |   |      |      |       |      |      |
|----|----|---|------|------|-------|------|------|
| 15 | P  | K | 0.25 | 0.05 | 0.48  | 0.09 | 2.18 |
| 19 | K  | K | 0.41 | 0.08 | 1.00  | 0.18 | 0.88 |
| 22 | Ti | K | 0.94 | 0.14 | 2.82  | 0.40 | 0.38 |
| 26 | Fe | K | 0.21 | 0.03 | 0.75  | 0.11 | 1.26 |
| 28 | Ni | K | 3.90 | 0.60 | 14.39 | 2.03 | 0.12 |
